# Supplementary material for: Selective formation of pyridinic-type nitrogen-doped graphene and its application in lithium-ion battery anodes
Source: Royal Society of Chemistry journal article supplement (doi:10.1039/d0ra06199a), 2020-01-01
Supplement: d0ra06199a1.pdf [file d0ra06199a1.pdf]

## Supplementary Information

### Selective formation of predominantly pyridinic type nitrogen-doped graphene and its application in lithium-ion battery anodes

Jacob D. Bagley,<sup>a</sup> Deepan Kishore Kumar,<sup>b</sup> Kimberly See,<sup>a</sup> Nai-Chang Yeh<sup>\*c</sup>

<sup>a</sup>Division of Chemistry and Chemical Engineering, California Institute of Technology, Pasadena, CA, 91125, USA

<sup>b</sup>Department of Electrical Engineering, California Institute of Technology, Pasadena, CA, 91125, USA

<sup>c</sup>Department of Physics, California Institute of Technology, Pasadena, CA, 91125, USA

\* Corresponding author. Tel: +1 (626) 395-4313. E-mail: ncyeh@caltech.edu (Nai-Chang Yeh)

Supplementary Note 1

Supplementary Note 2

Supplementary Note 3

Supplementary Note 4

Supplementary Figure 1

Supplementary Figure 2

Supplementary Figure 3

Supplementary Figure 4

Supplementary Figure 5

## Supplementary Note 1: Experimental setup for high-yield graphene synthesis

In order to fabricate large amounts of GNSPs efficiently, we built a PECVD deposition system with eight chambers in parallel shown in Fig. S1. Input of hydrogen and methane gas is controlled by mass flow controllers (MFCs), and input of 3-chloropyridine is controlled by a leak valve which is connected to a vacuum sealed vial. The pressure is measured by a pressure gauge (PG), and the gas composition is measured by a residual gas analyser (RGA). The gases are split to eight quartz chambers which each have Evenson cavities connected to microwave power sources. A cold trap (CT) captures harmful by products of the reaction (HCl, etc), and a vacuum pump (VP) is continually pumping the system. The pressure is controlled by a throttle valve (TV) that opens and closes with feedback from the pressure gauge to maintain a pressure setpoint. We have also measured the pressure in the quartz chamber, and under the conditions of this experiment (*i.e.*, a pressure of 4.8 Torr at PG and hydrogen and methane flow rates of 48 sccm and 5 sccm, respectively) the pressure in the chamber is  $\sim 500$  mTorr, consistent with the previous report of Hsu *et al* [14].

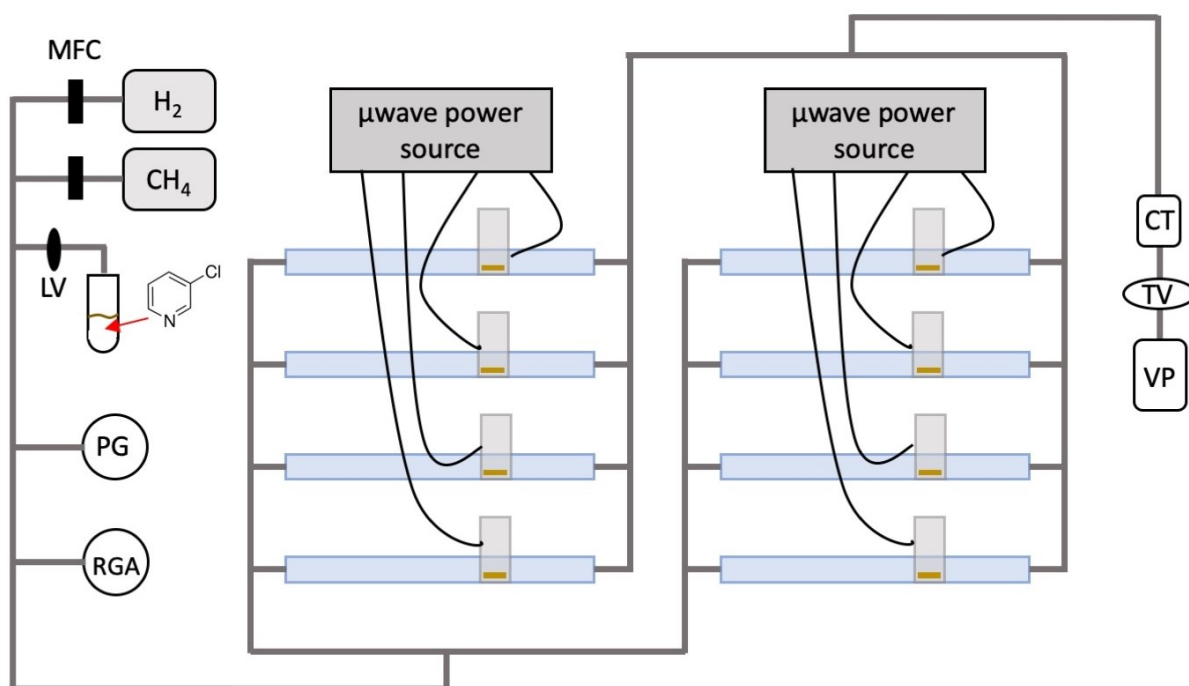

**Fig. S1.** Schematic of the eight-chamber PECVD graphene growth system.

## **Supplementary Note 2: Determining the yield of N-GNSPs per chamber**

The yield of N-GNSPs synthesized on copper substrates as a function of time is shown in Fig. S2 for one PECVD chamber. A fit of these data reveal a growth rate of  $\sim 6 \text{ mg/cm}^2/\text{hr}$ . Our deposition chamber affords  $\sim 1 \text{ cm}^2$  substrates within each plasma cavity, so our eight chamber growth yields a growth rate of  $\sim 48 \text{ mg/hr}$  of N-GNSPs.

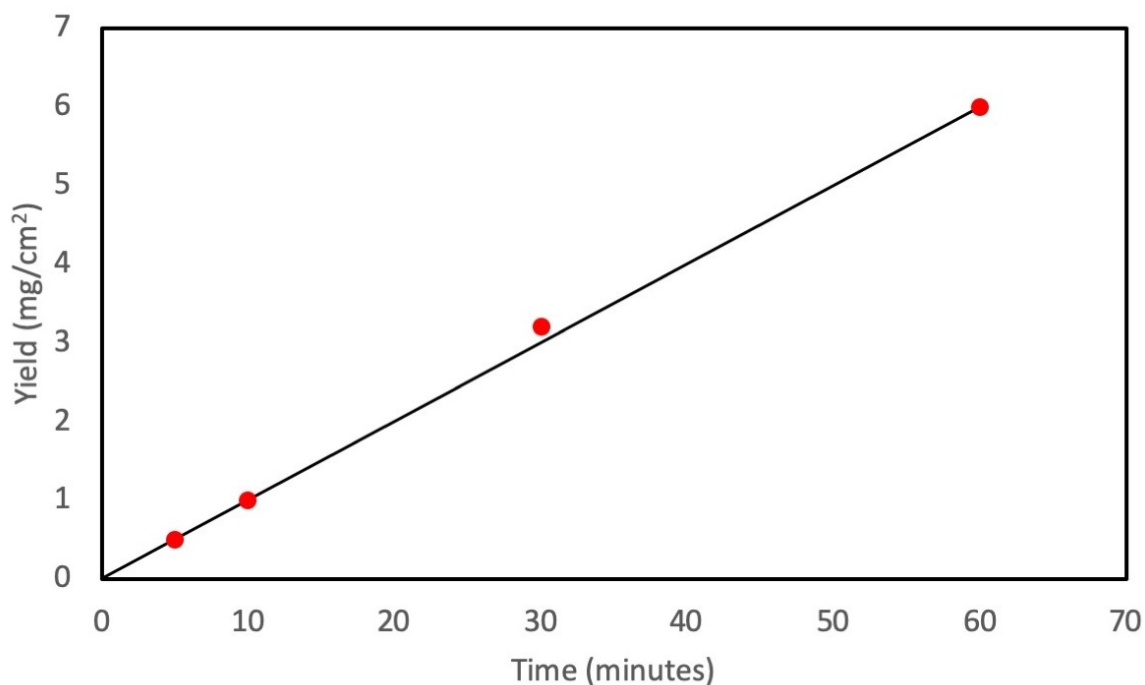

**Fig. S2.** Yield of N-GNSPs-*vs.*-time obtained from one PECVD growth chamber.

### Supplementary Note 3: Procedure for fabricating coin cells of lithium ion batteries (LIBs)

The procedure for fabricating two types of LIB coin cells with N-GNSPs as the anode is schematically shown below in Fig. S3.

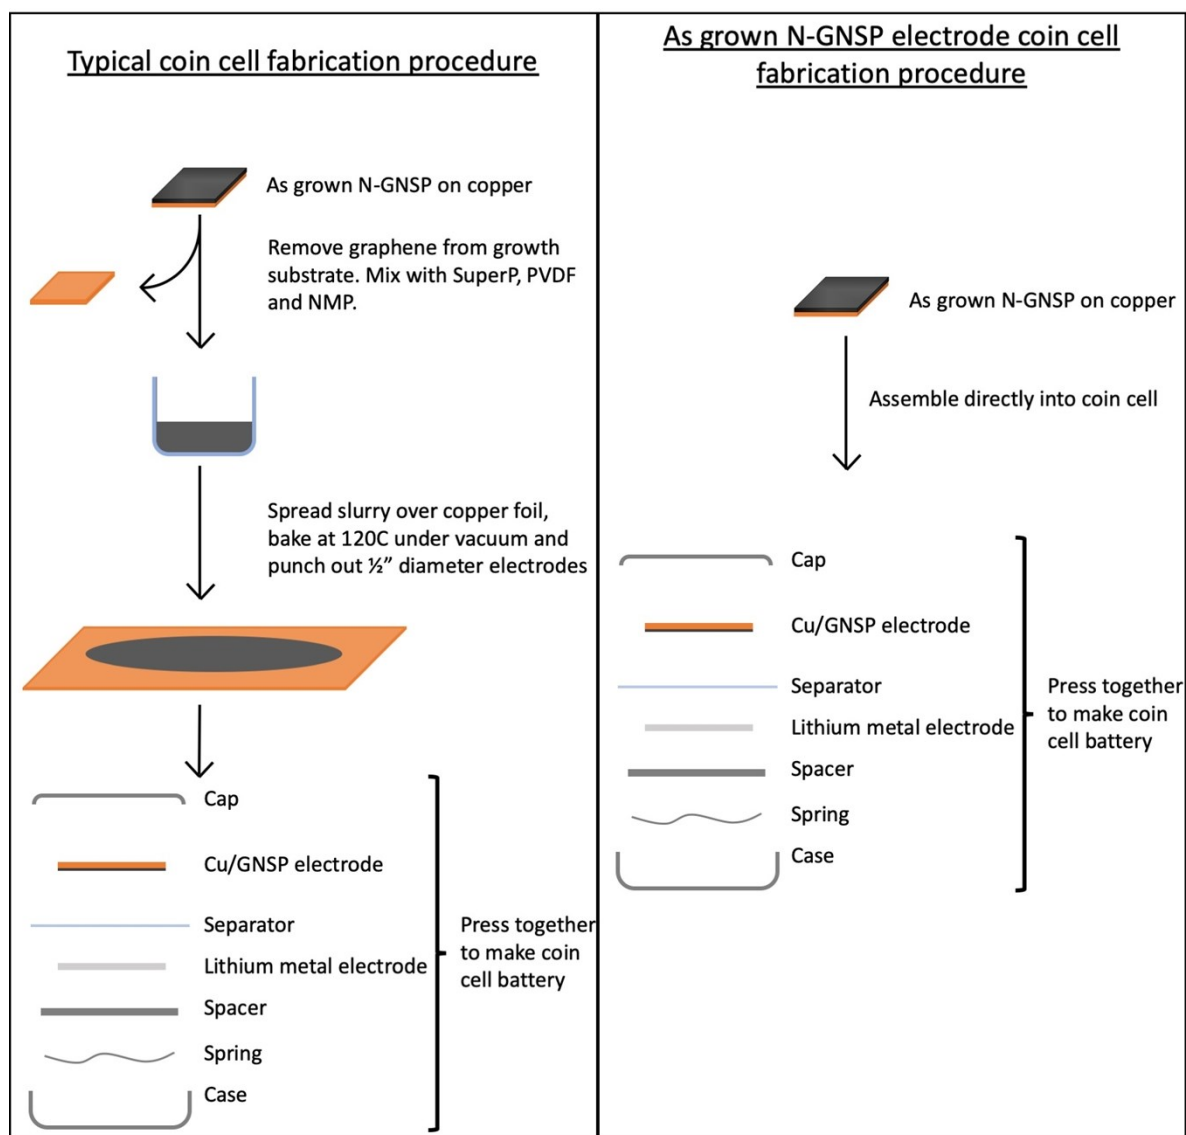

**Fig. S3.** Schematic of typical coin cell fabrication (left) and fabrication of coin cell using N-GNSP not removed from the growth substrate

#### Supplementary Note 4: Procedure for estimating GNSPs and N-GNSPs capacitance

According to the widely accepted *Electrochemical Methods* by Bard and Faulkner,<sup>1</sup> double layer capacitance can be estimated from the slope of the voltage vs. time response due to a current step. To appropriately perform this measurement, however, the electrochemical response must be due to non-faradaic (capacitive) processes rather than faradaic (redox) processes, which can be ensured by measuring the voltage vs time response shortly after the current step, as non-faradaic processes tend to be much faster than faradaic processes. Therefore, we used the first ten seconds of the first galvanostatic discharge of GNSPs and N-GNSPs to estimate their capacitances (shown in Fig. S4). The fairly linear slopes indicate that the electrochemical response during this time is, in fact, dominated by non-faradaic processes, as faradaic processes tend to cause voltage plateaus in galvanostatic measurements. The capacitance is calculated according to

$$\text{Capactiance} = \frac{\text{Current}}{\text{Slope}}$$

The respective slopes of the GNSPs and N-GNSPs discharge curves are -0.0093 V/s and -0.018 V/s, corresponding to capacitances of 5.6 F/g and 10.8 F/g.

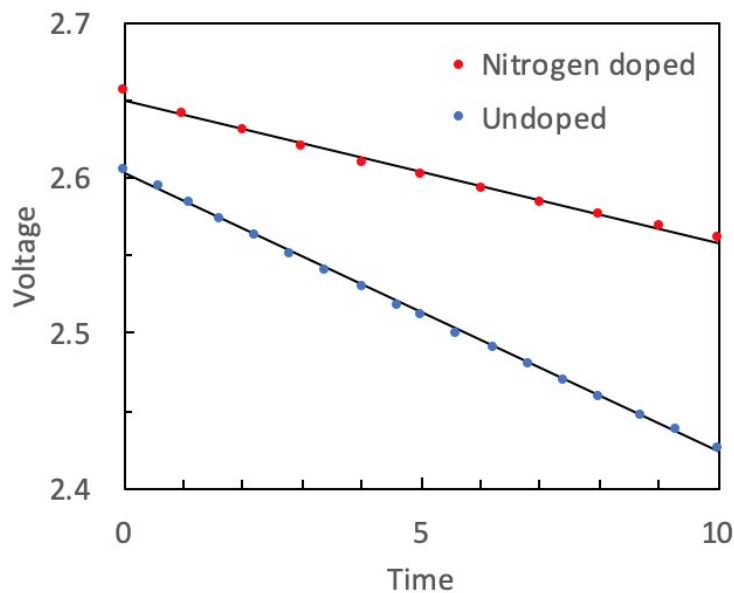

**Fig. S4.** First ten seconds of GNSPs and N-GNSPs first galvanostatic discharge curve.

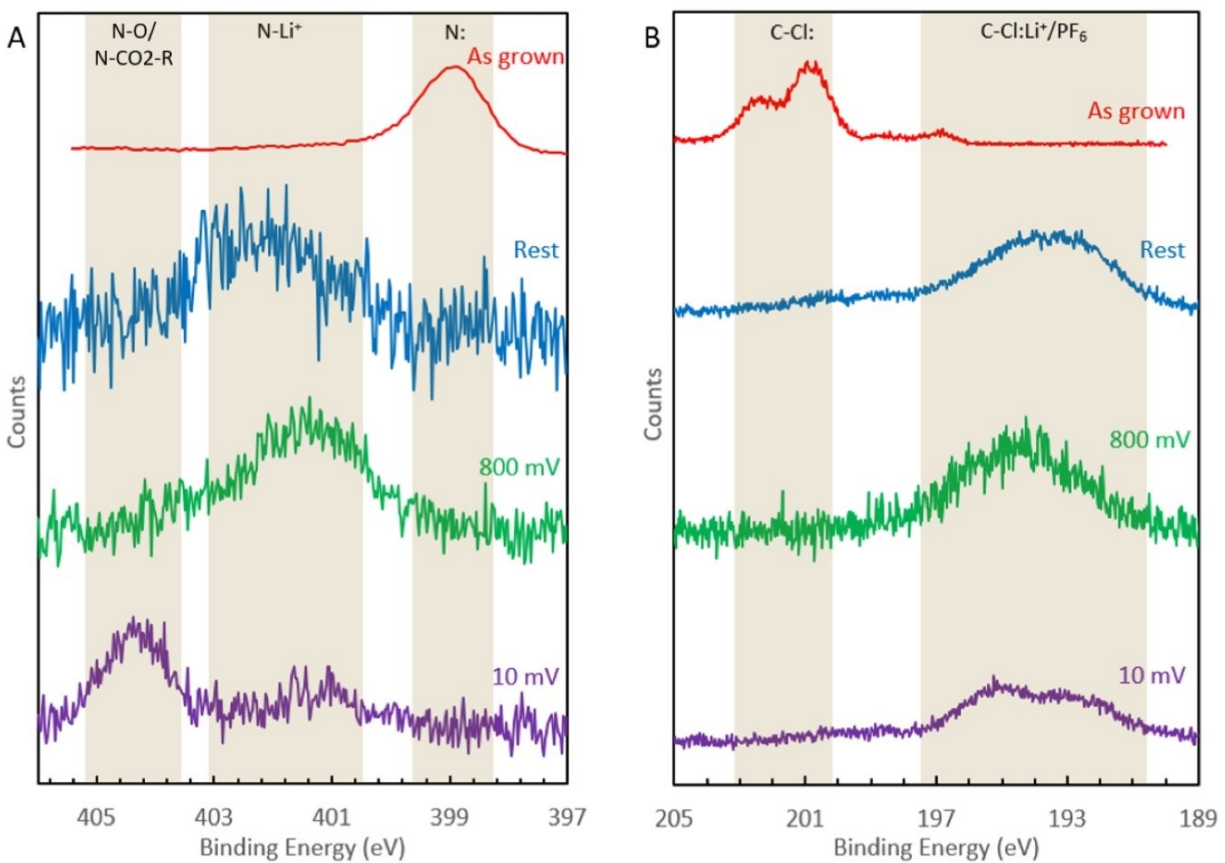

**Fig. S5.** Raw data (before smoothing) of Fig. 5, showing that the same peaks and shifts are still visible and apparent, which validates the data treatment used to generate Fig. 5.

**Reference:**

1. *Electrochemical Methods: Fundamentals and Applications*, A. J. Bard and L. R. Faulkner, ISBN: 0471055425, John Wiley & Sons, Inc. (1980).
